# Supplementary material for: Enhancing the separation of C2H4/C2H6 in customized MOR zeolites
Source: Royal Society of Chemistry journal article supplement (doi:10.1039/d4qi00236a), 2024-01-01
Supplement: d4qi00236a1.pdf [file d4qi00236a1.pdf]

## ***Supporting Information***

### **Enhancing the Separation of C<sub>2</sub>H<sub>4</sub>/C<sub>2</sub>H<sub>6</sub> in Customized MOR Zeolite**

Hongwei Chen,<sup>†a</sup> Binyu Wang,<sup>†b</sup> Bin Zhang,<sup>†c</sup> Yongheng Ren,<sup>a</sup> JiuHong Chen,<sup>a</sup> Jiabao Gui,<sup>a</sup> Xiufeng Shi,<sup>c</sup> Wenfu Yan,<sup>b</sup> Jinping Li,<sup>a</sup> and Libo Li<sup>\*a</sup>

*a* College of Chemical Engineering and Technology, State Key Laboratory of Clean and Efficient Coal Utilization, Taiyuan University of Technology, Taiyuan 030024, China.

*b* State Key Laboratory of Inorganic Synthesis and Preparative Chemistry, College of Chemistry, Jilin University, 2699 Qianjin Street, Changchun 130012, China.

*c* College of Chemistry, Taiyuan University of Technology, Taiyuan 030024, China.

\*Corresponding Author.

†These authors contributed equally.

E-mail: lilibo@tyut.edu.cn (Libo Li)

*This Supporting Information Includes:*

Details for experiments, characterizations and calculations

Tables S1-S5

Figures S1-S25

**Table S1. Reagents information.**

| Name             | Chemical formula   | Manufacturer                                    | Purity | Mass  |
|------------------|--------------------|-------------------------------------------------|--------|-------|
| Silica sol       | SiO <sub>2</sub>   | JALON Micro-nano New Materials Co., Ltd         | 30wt%  | 30 kg |
| Sodium hydroxide | NaOH               | China National Pharmaceutical Group Corporation | AR     | 500 g |
| Sodium aluminate | NaAlO <sub>2</sub> | China National Pharmaceutical Group Corporation | AR     | 500 g |
| Deionized water  | H <sub>2</sub> O   | China National Pharmaceutical Group Corporation | -      | 25 kg |
| COM-MOR          | MOR                | Tianjin Yuanli Chemical Co., LTD                | >99%   | 100 g |

**Table S2. The information of the samples synthesized.**

| Sequence | Feed Gel Si/Al | NaAlO <sub>2</sub> | Product | Crystallinity % | Product Si/Al <sup>a</sup> | Product Si/Al <sup>b</sup> |
|----------|----------------|--------------------|---------|-----------------|----------------------------|----------------------------|
| 1        | 22.88          | 0.25375            | AM      | 0               | -                          | -                          |
| 2        | 19.07          | 0.3045             | AM      | 0               | -                          | -                          |
| 3        | 16.34          | 0.35525            | AM      | 0               | -                          | -                          |
| 4        | 14.3           | 0.406              | AM+MOR  | 31.5            | -                          | -                          |
| 5        | 12.71          | 0.45675            | MOR     | 78.6            | 12.1                       | 9.15                       |
| 6        | 11.44          | 0.5075             | MOR     | 79.7            | 10.1                       | 8.47                       |
| 7        | 10.4           | 0.55825            | MOR     | 81.2            | 8.6                        | 6.56                       |
| 8        | 9.53           | 0.609              | MOR     | 81.6            | 7.53                       | 6.10                       |
| 9        | 8.17           | 0.7105             | MOR     | 81.5            | 6.74                       | 5.78                       |
| 10       | 7.15           | 0.812              | MOR     | 80.6            | 6.21                       | 5.02                       |
| 11       | 6.36           | 0.9135             | MOR     | 80.5            | 5.2                        | 4.54                       |
| 12       | 5.72           | 1.015              | MOR     | 78.9            | 5.04                       | 4.31                       |
| 13       | 5.20           | 1.1165             | MOR     | 75.1            | 4.87                       | 3.78                       |
| 14       | 4.58           | 1.26875            | AM-MOR  | 52.7            | -                          | -                          |
| 15       | 3.81           | 1.5225             | AM      | 33.8            | -                          | -                          |
| 16       | 2.86           | 2.03               | AM      | 16.2            | -                          | -                          |

[AM] Amorphous forms. <sup>a</sup>: ICP elemental analysis. <sup>b</sup>: EDS spectral analysis.

$$\text{Crystallinity} = \frac{\text{Area of crystalline peak}}{\text{Area of all peaks (crystalline + Amorphous)}} \times 100$$

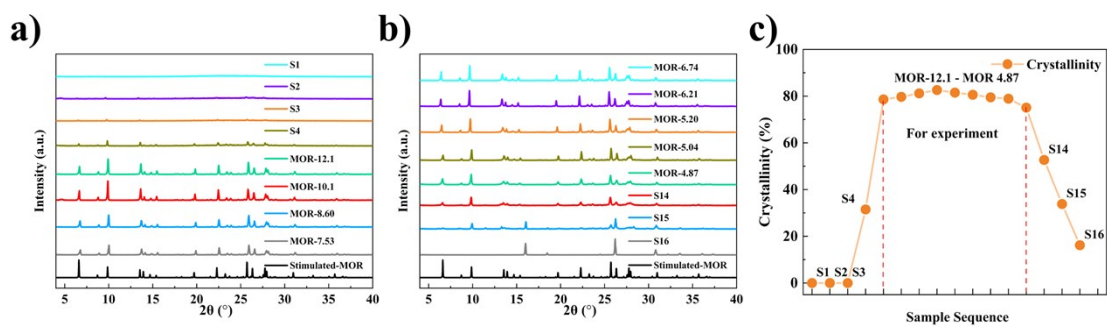

**Fig. S1.** (a-b) Simulated XRD pattern and experimental XRD patterns of MOR synthesized, (c) Crystallinity of samples.

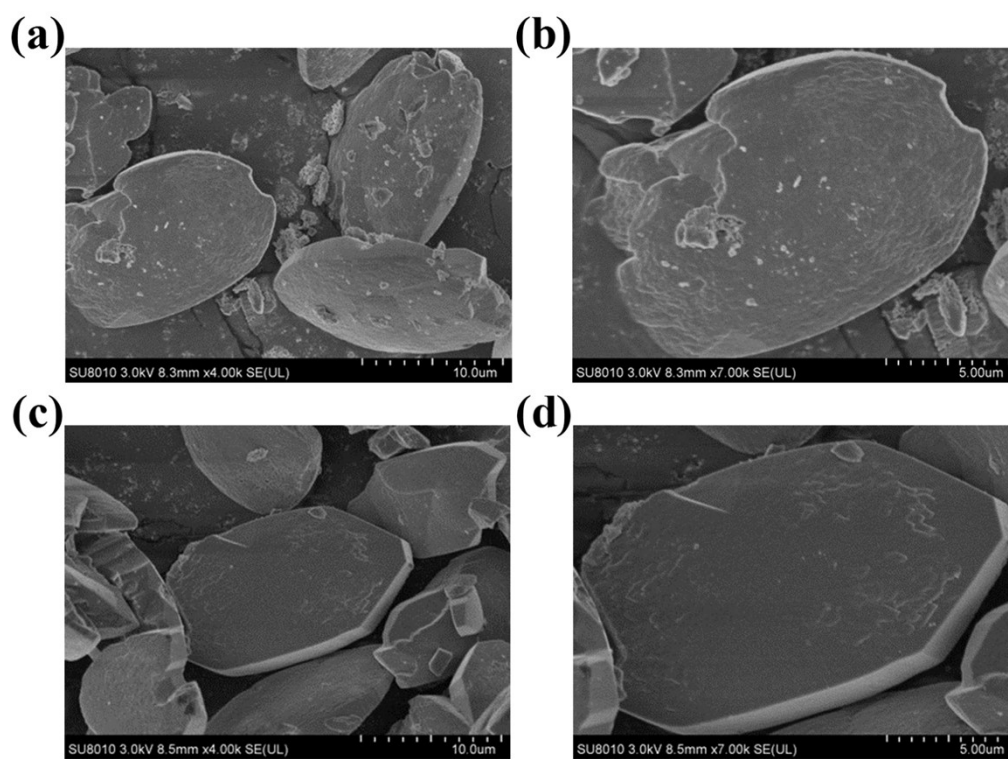

**Fig. S2.** The SEM images of (a-b) MOR-12.1 and (c-d) MOR-10.1.

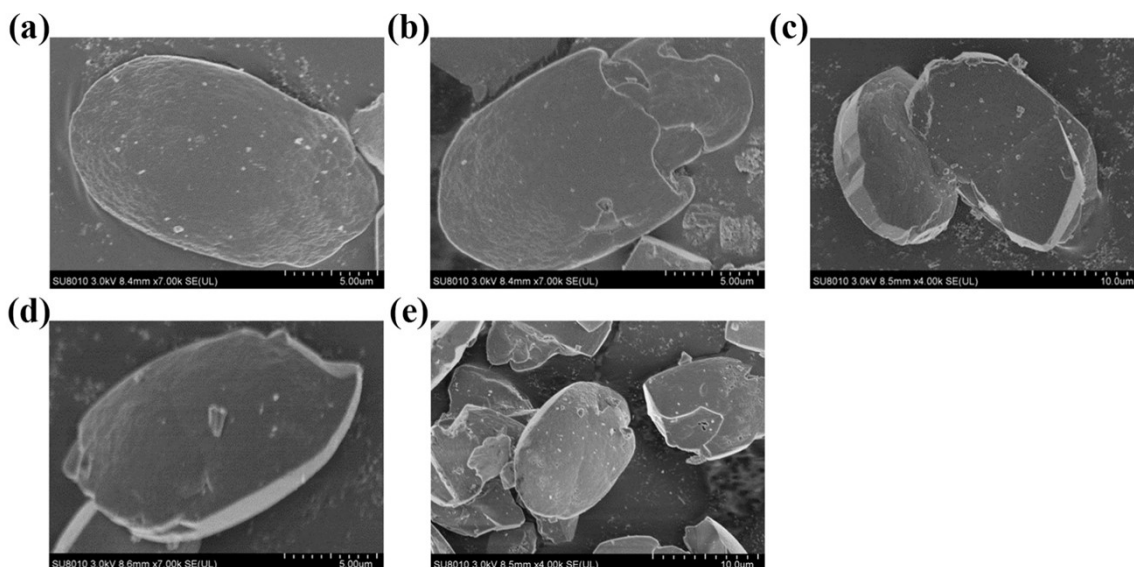

Fig. S3. The SEM images of (a) MOR-8.6, (b) MOR-7.5, (c) MOR-6.7, (d) MOR-5.2 and (e) MOR-4.8.

### Thermogravimetric analysis

Thermal stability was evaluated by conducting thermogravimetric (TG) analysis on an STA449F5 instrument with a constant flow of nitrogen, while the sample was heated at a rate of 10 K/min.

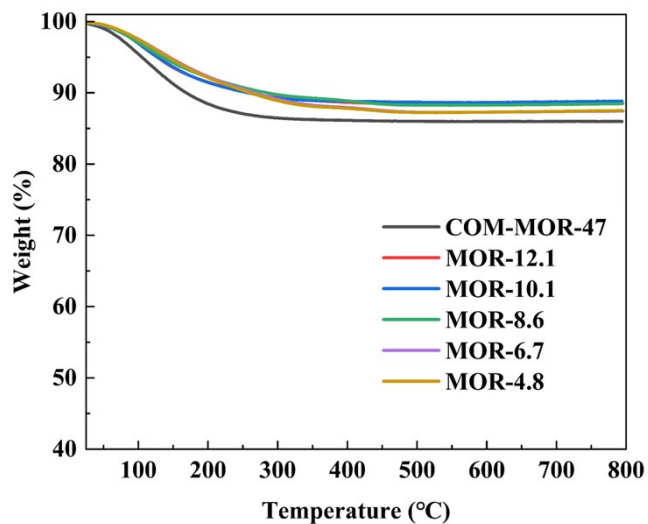

Fig. S4. TG curves.

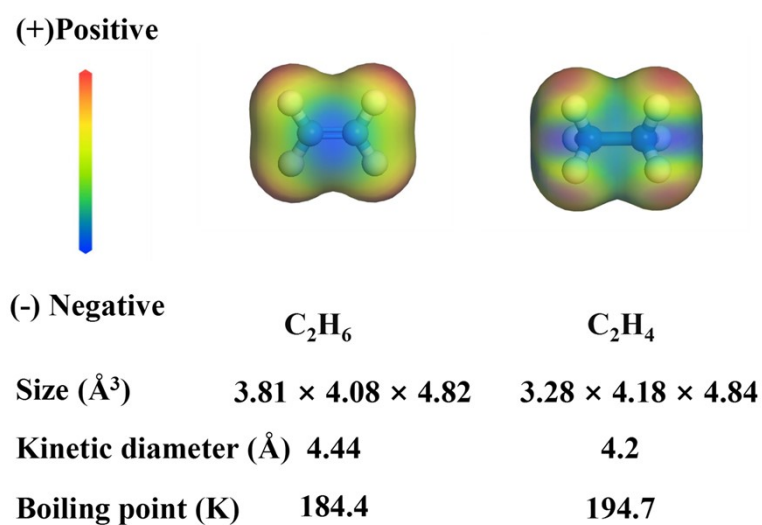

Fig. S5. Information of guest molecules and electrostatic potential distribution.

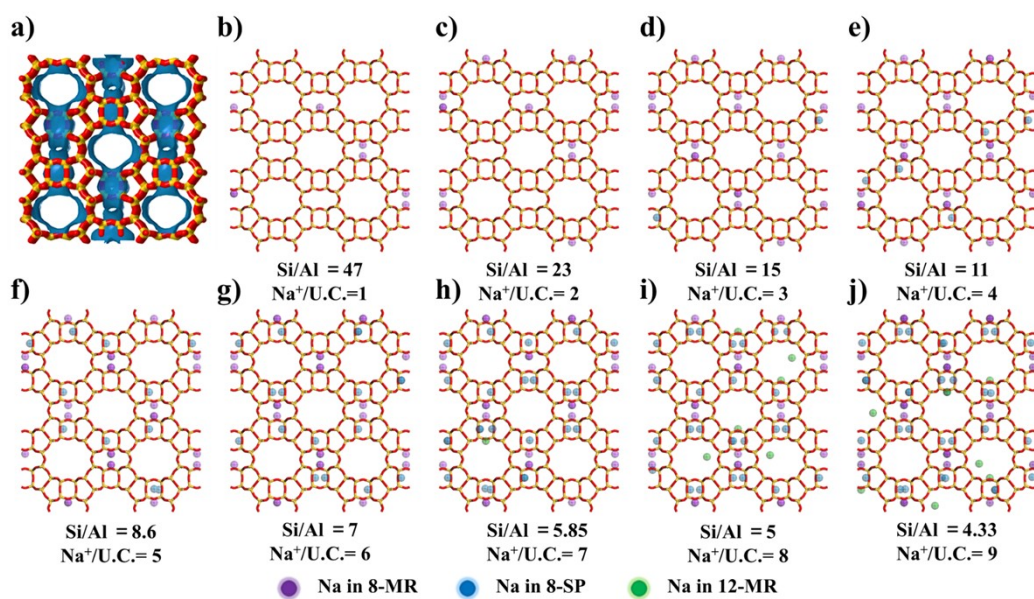

Fig. S6. (a) Diffusion channel system of MOR zeolite, (b-j)  $Na^+$  cations distribution in MOR-x.

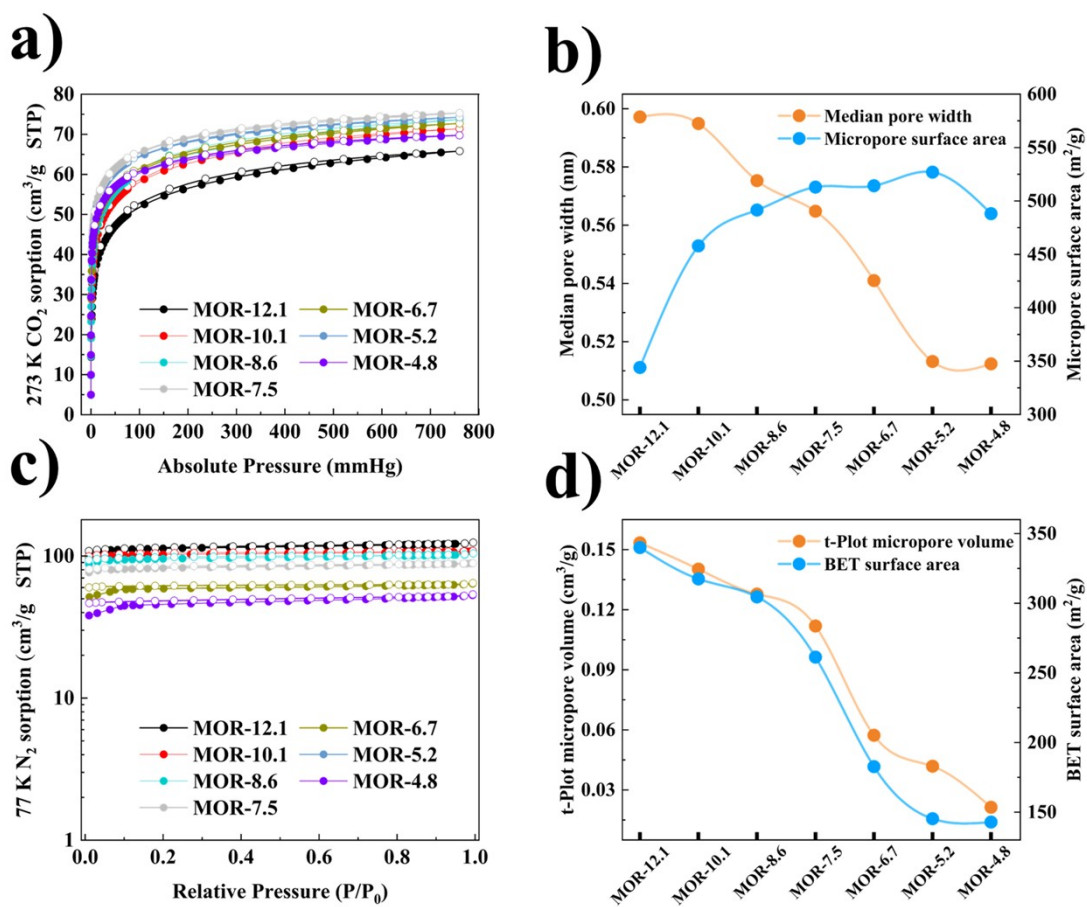

**Fig. S7.** (a, c) 273 K CO<sub>2</sub> and 77 K N<sub>2</sub> adsorption isotherms of MOR-x, (b) Median pore width and micropore surface area of MOR-x, (d) the specific surface area and micropore volume of MOR-x.

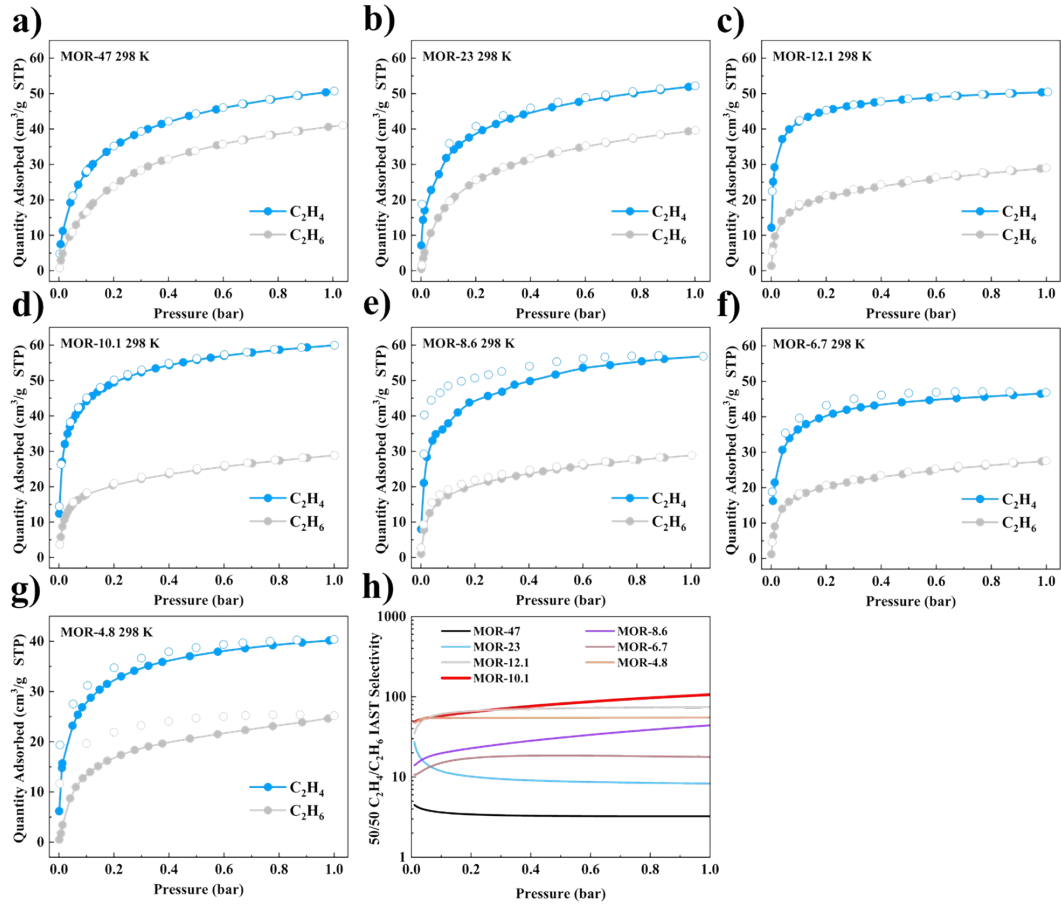

**Fig. S8.** (a-g) Single component adsorption isotherms of C<sub>2</sub>H<sub>4</sub>, and C<sub>2</sub>H<sub>6</sub> on MOR-*x* at 298 K, (h) IAST selectivity for MOR-*x*.

## Dual-site Langmuir-Freundlich isotherm model

The sorption of C<sub>2</sub>H<sub>4</sub> and C<sub>2</sub>H<sub>6</sub> was described using a Dual-site Langmuir- Freundlich isotherm model, which is formulated as:

$$q = \frac{q_c \times k_c \times P^{n_c}}{1 + k_c \times P^{n_c}} + \frac{q_i \times k_i \times P^{n_i}}{1 + k_i \times P^{n_i}}$$

The model involves parameters such as  $q_c$  (cm<sup>3</sup> g<sup>-1</sup>) and  $q_i$  (cm<sup>3</sup> g<sup>-1</sup>), which represent the saturation capacities of sites *c* and *i*; as well as  $k_c$  and  $k_i$ , which are the corresponding adsorption equilibrium constants that reflect the affinity coefficients of sites *c* and *i*, respectively. The model is based on the equilibrium pressure, which is denoted as *P*.

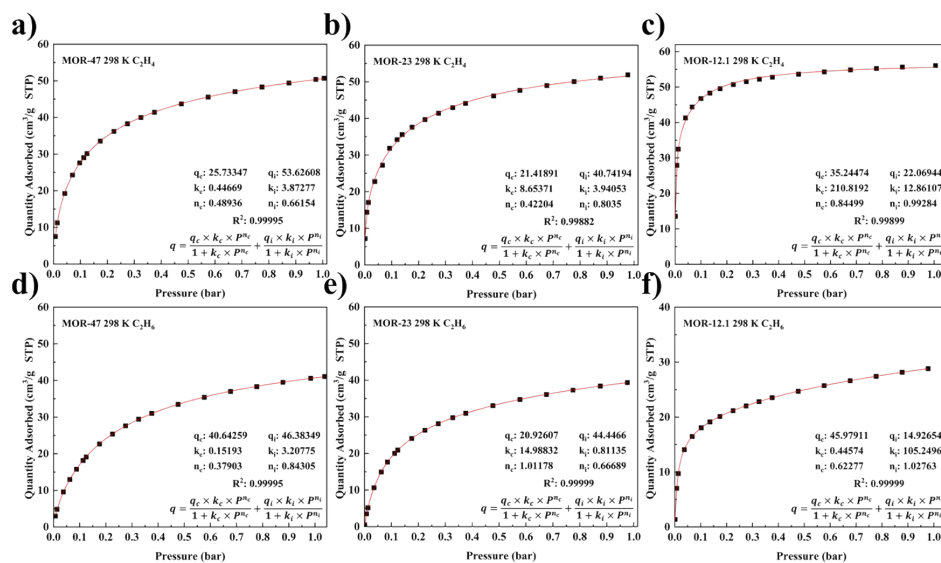

Fig. S9. (a-f) Non-linear fitted curves for  $C_2H_4$  and  $C_2H_6$  adsorption isotherms of MOR-x ( $x = 47, 23, \text{ and } 12.1$ ).

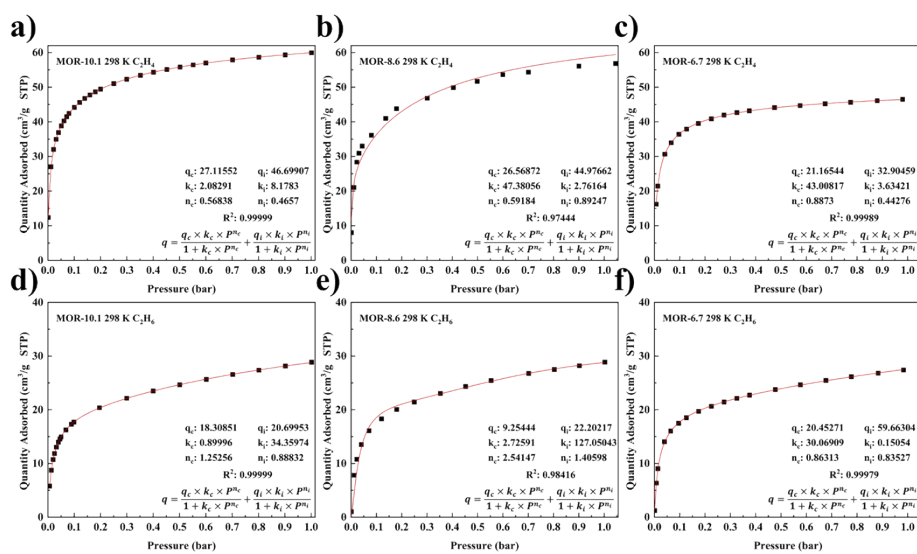

Fig. S10. (a-f) Non-linear fitted curves for  $C_2H_4$  and  $C_2H_6$  adsorption isotherms of MOR-x ( $x = 10.1, 8.6, \text{ and } 6.7$ ).



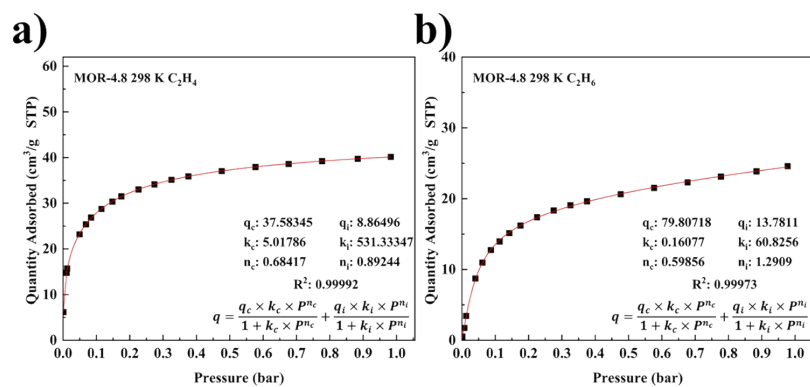

Fig. S11. (a-d) Non-linear fitted curves for  $C_2H_4$  and  $C_2H_6$  adsorption isotherms of MOR-4.8.

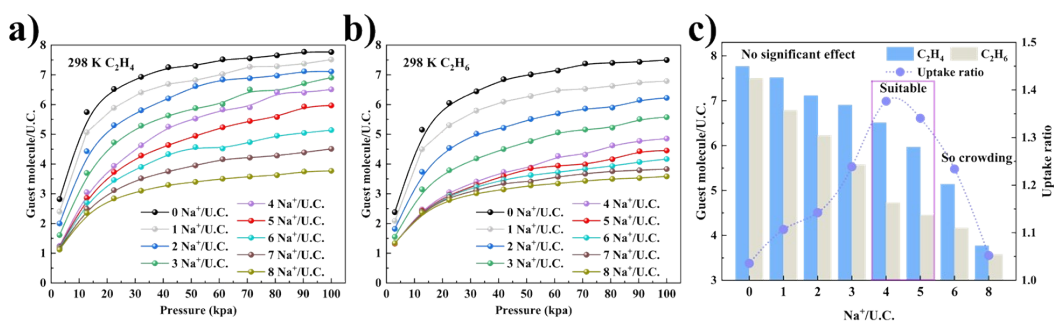

Fig. S12. Prediction of (a)  $C_2H_4$  and (b)  $C_2H_6$  adsorption isotherms, and (c) uptake ratio of MOR-x.

**Table S3. Performance of inorganic adsorbents for C<sub>2</sub>H<sub>4</sub>/C<sub>2</sub>H<sub>6</sub> (50/50) separation.**

| Adsorbent       | C <sub>2</sub> H <sub>4</sub> adsorbed<br>(mmol g <sup>-1</sup> ) | Selectivity   | Reference        |
|-----------------|-------------------------------------------------------------------|---------------|------------------|
| ITQ-55          | 1.5                                                               | ~100          | 1                |
| Na-ETS-10       | 2.04                                                              | 4.7           | 2                |
| Ag/SBA-15       | 0.76                                                              | 5.27          | 3                |
| Cu-MCM-48       | 0.49                                                              | 3.80          | 4                |
| CuCl@HY         | 2.14                                                              | 67            | 5                |
| CuCl/NaX        | 1.90                                                              | 3.57          | 6                |
| ITQ-29          | 1.33                                                              | 1.66          | 7                |
| MOR-46          | 2.26                                                              | 3.24          | This work        |
| MOR-23          | 2.33                                                              | 8.30          | This work        |
| MOR-12.1        | 2.25                                                              | 58.63         | This work        |
| <b>MOR-10.1</b> | <b>2.67</b>                                                       | <b>106.39</b> | <b>This work</b> |
| MOR-8.6         | 2.53                                                              | 44.06         | This work        |
| MOR-6.7         | 2.09                                                              | 17.75         | This work        |
| MOR-4.8         | 1.80                                                              | 16.78         | This work        |

## Isosteric heat of adsorption ( $Q_{st}$ )

Isotherms for  $C_2H_4$ , and  $C_2H_6$  sorption were measured at 298 K and 323 K, these isotherms were fitted to the virial equation:

$$\ln P = \ln N + \frac{1}{T} \sum_{i=0}^m a_i N^i + \sum_{i=0}^n b_i N^i$$

Where  $N$  is the amount of gas adsorbed at the pressure  $P$ ,  $a$  and  $b$  are virial coefficients,  $m$  and  $n$  are the number of coefficients require to adequately describe the isotherm. To calculate the  $Q_{st}$  values, the fitting parameters obtained from equation were then plugged into the following equation:

$$Q_{st} = -R \sum_{i=0}^m a_i N^i$$

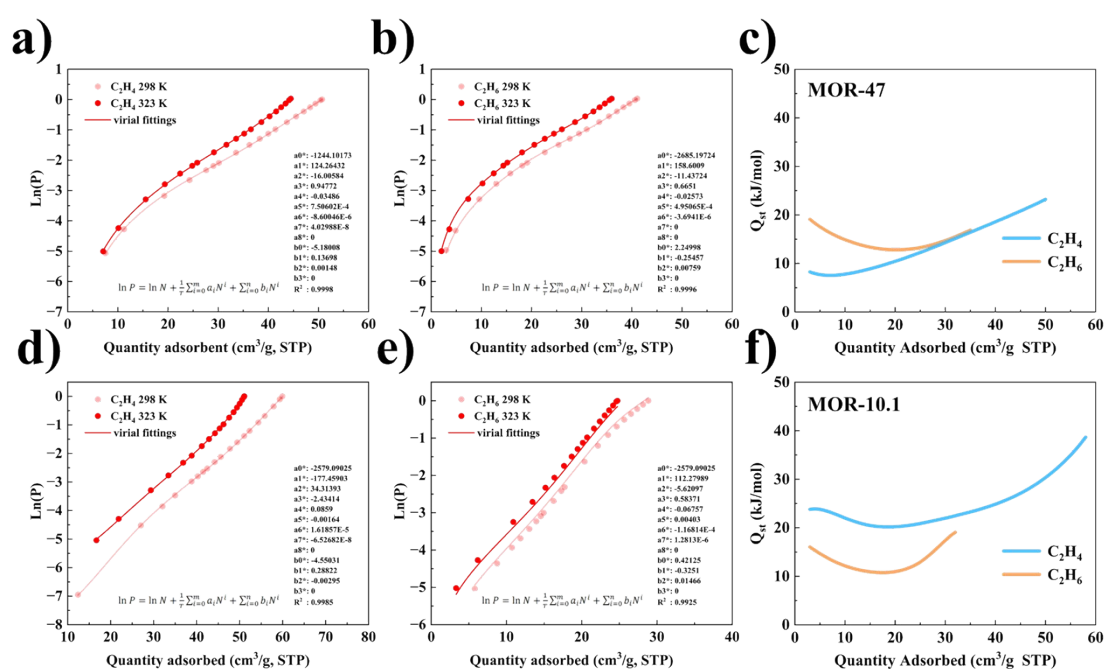

**Fig. S13.** Virial fitting of (a, d)  $C_2H_4$ , and (b, e)  $C_2H_6$  adsorption isotherms of MOR-10.1 and 47, (c, f) Isosteric heats of adsorption of  $C_2H_4$ , and  $C_2H_6$  of MOR-10.1 and 47.

## Diffusional time constants

Diffusional time constants ( $D'$ ,  $D/r^2$ ) were calculated by the short-time solution of the diffusion equation assuming a step change in the gas-phase concentration, clean beds initially, and micropore diffusion control:

$$\frac{Q_t}{Q_\infty} = \frac{6}{\sqrt{\pi}} \cdot \sqrt{\frac{D}{r^2}} \cdot t$$

Where  $Q_t$  is the gas uptake at time  $t$ ,  $Q_\infty$  is the gas uptake at equilibrium,  $D$  is the diffusivity and  $r$  is the radius of the equivalent spherical particle. The slopes of  $Q_t/Q_\infty$  versus  $\sqrt{t}$  are derived from the fitting of the plots in the low gas uptake range.

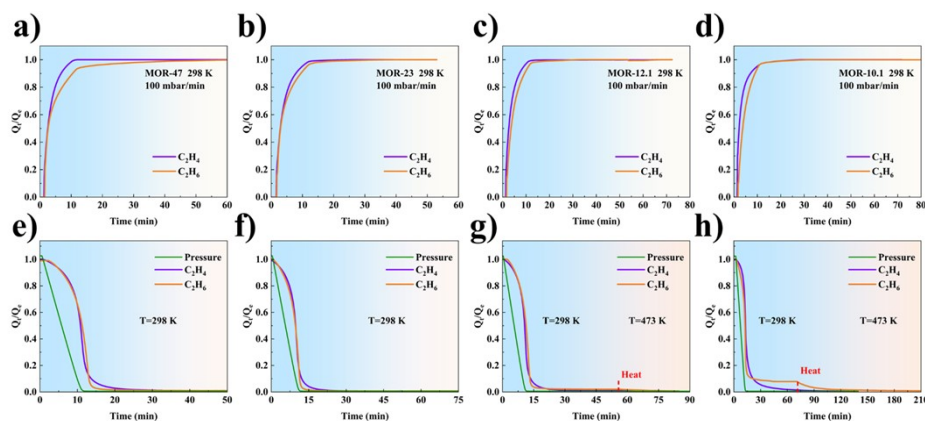

Fig. S14. (a-d) Adsorption kinetic and (e-h) desorption behaviors of MOR-47, 23, 12.1, and 10.1.

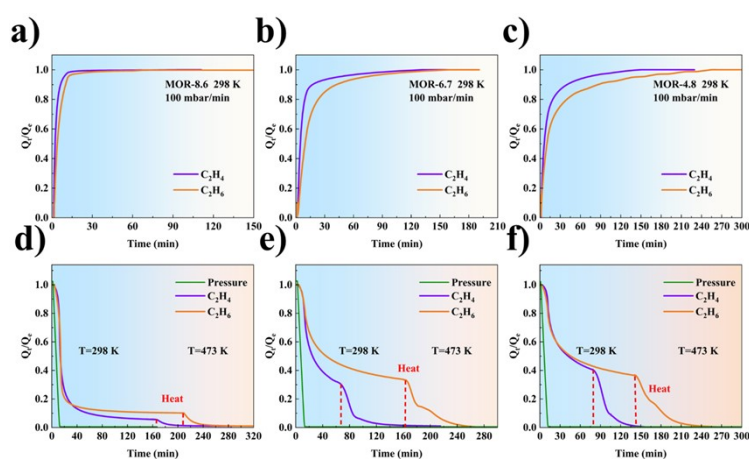

Fig. S15. (a-c) Adsorption kinetic and (d-f) desorption behaviors of MOR-8.6, 6.7, and 4.8.

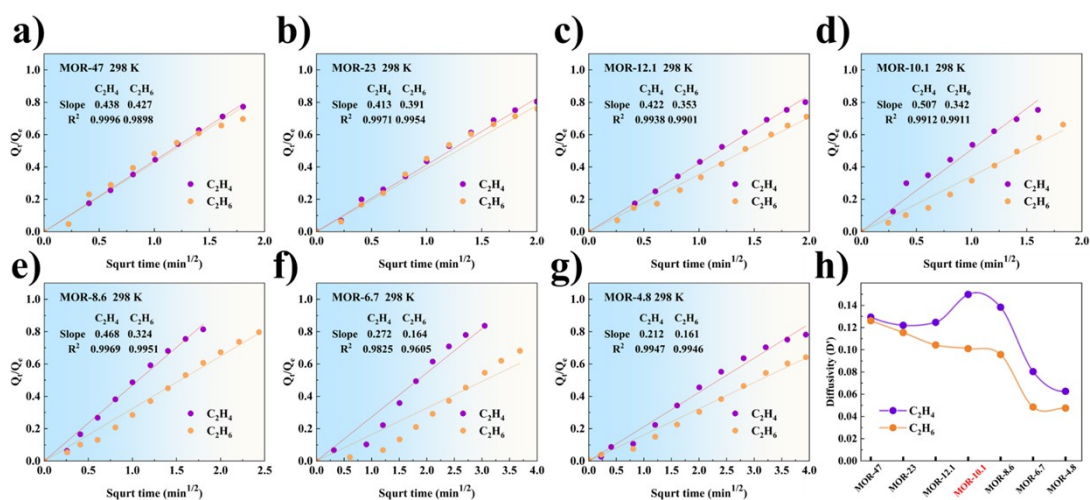

Fig. S16. Diffusional time constant calculation details for MOR-x at 298 K.

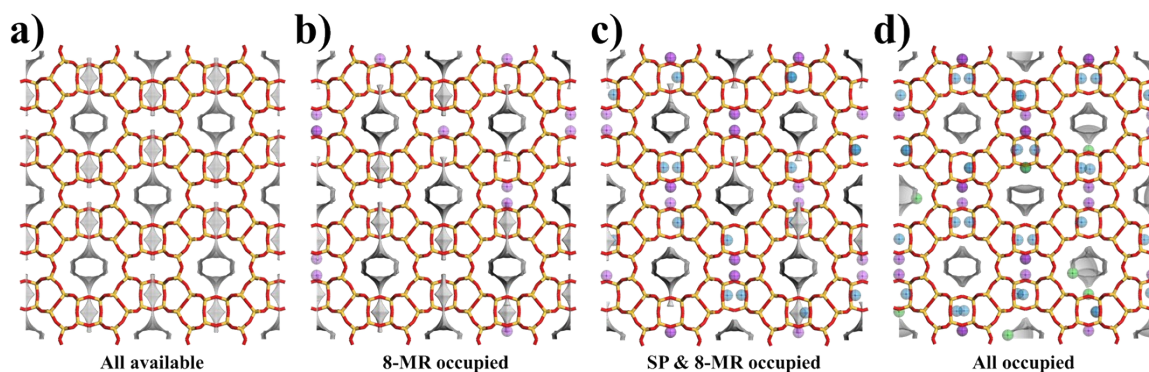

Fig. S17. (a-d) Accessible space in MOR with different Si/Al (pure-silica, 2 Na<sup>+</sup>/U.C, 4 Na<sup>+</sup>/U.C, and 6 Na<sup>+</sup>/U.C.).

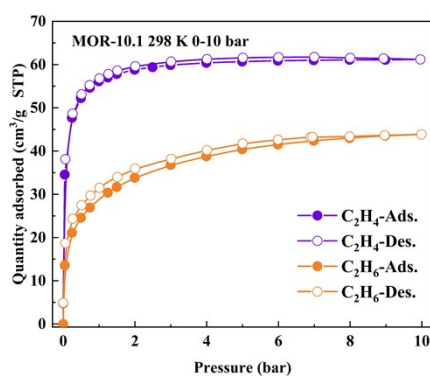

Fig. S18. High pressure adsorption isotherm of C<sub>2</sub>H<sub>4</sub> and C<sub>2</sub>H<sub>6</sub> of MOR-10.1.

## Separation Experiment

All mixture gases were provided by Jining XieLi Special Gas Co., Ltd.

Table S4. Detection of gases

| Gas      | Detection sensitivity | Carrier gas |
|----------|-----------------------|-------------|
| $C_2H_4$ | 10 ppm                | Helium      |
| $C_2H_6$ | 10 ppm                | Helium      |
| $N_2$    | 100 ppm               | Argon       |

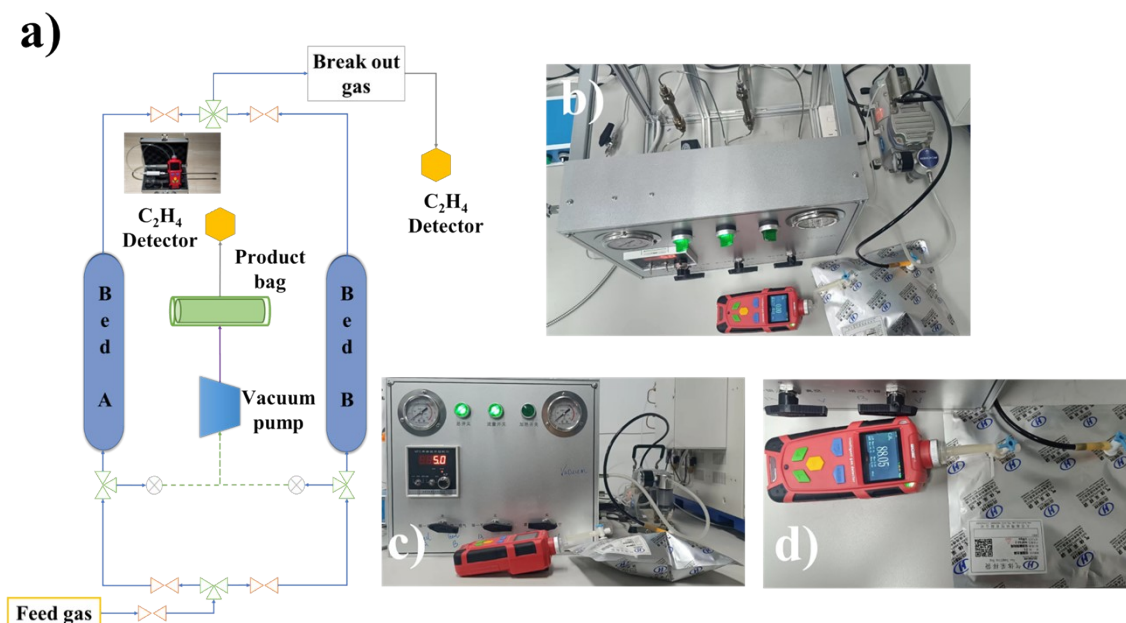

Fig. S19. (a) Scheme of mini-VPSA setup, (b-d) Photos of setup.

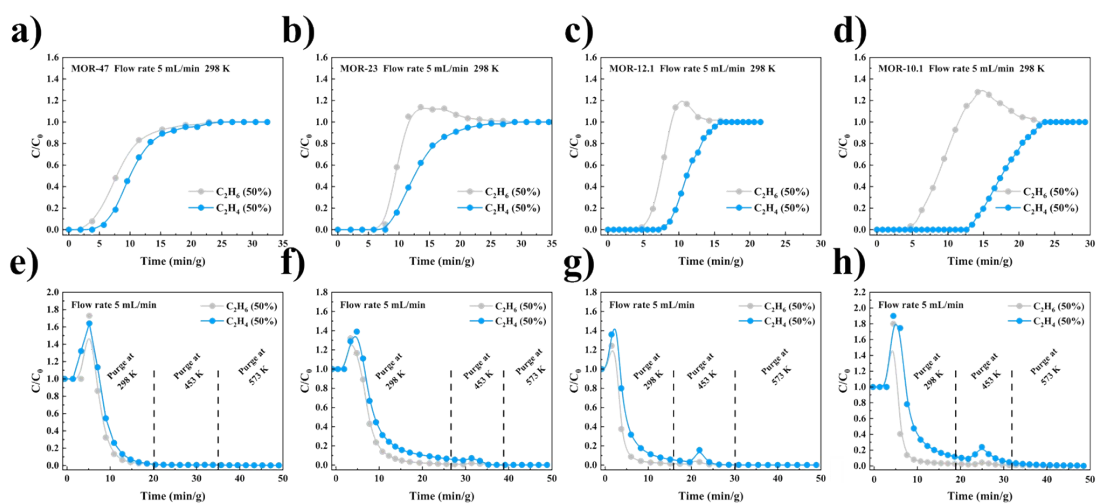

Fig. S20.  $C_2H_4/C_2H_6$  (50/50, v/v) breakthrough experiments of MOR-47, 23, 12.1, and 10.1.

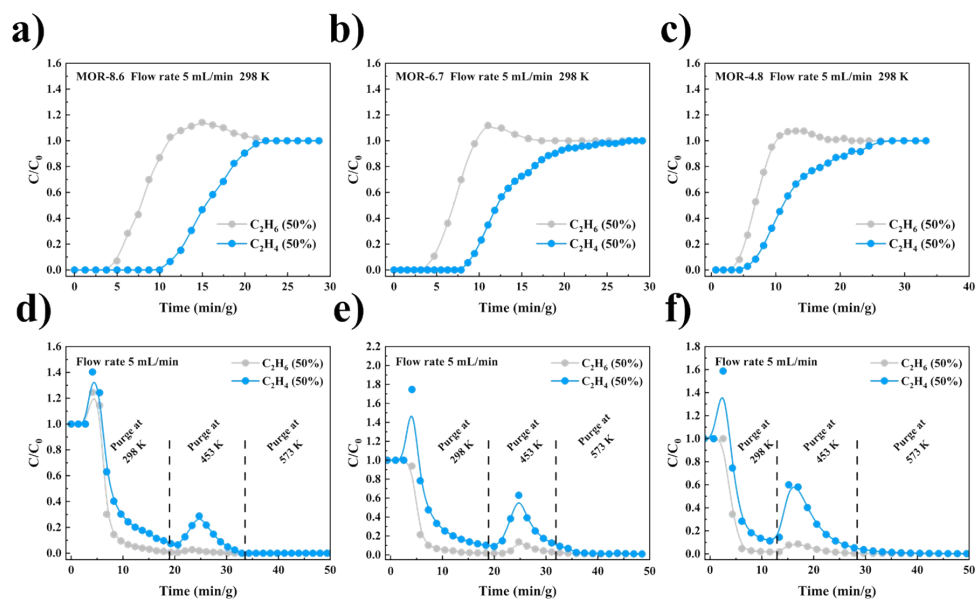

Fig. S21.  $C_2H_4/C_2H_6$  (50/50, v/v) breakthrough experiments of MOR-8.6, 6.7, and 4.8.

Table S5. Dynamic uptake of MOR-x.

| No.         | $C_2H_4$ dynamic uptake<br>(mmol $g^{-1}$ ) | $C_2H_4$ in each<br>super cell | $C_2H_6$ dynamic uptake<br>(mmol $g^{-1}$ ) | $C_2H_6$ in each<br>super cell |
|-------------|---------------------------------------------|--------------------------------|---------------------------------------------|--------------------------------|
| Pure silica | Blank control                               | 30                             | Blank control                               | 30                             |
| MOR-47      | 1.20                                        | 28                             | 0.95                                        | 22                             |
| MOR-23      | 1.27                                        | 29                             | 0.93                                        | 21                             |
| MOR-12.1    | 1.38                                        | 32                             | 0.75                                        | 17                             |
| MOR-10.1    | 1.98                                        | 47                             | 0.61                                        | 15                             |
| MOR-8.6     | 1.89                                        | 45                             | 0.76                                        | 16                             |
| MOR-6.5     | 1.48                                        | 35                             | 0.72                                        | 17                             |
| MOR-4.8     | 1.40                                        | 34                             | 0.70                                        | 17                             |

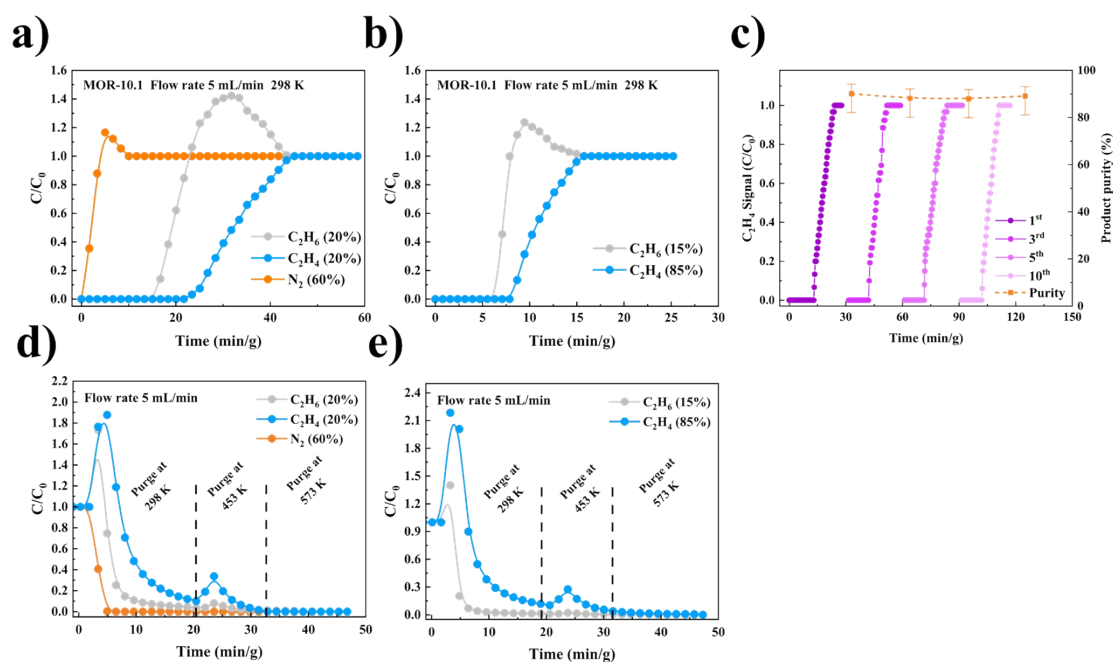

**Fig. S22.** (a, d) C<sub>2</sub>H<sub>4</sub>/C<sub>2</sub>H<sub>6</sub>/N<sub>2</sub> (20/20/60, v/v/v) and (b, e) C<sub>2</sub>H<sub>4</sub>/C<sub>2</sub>H<sub>6</sub> (85/15, v/v) breakthrough experiments of MOR-10.1, (c) separation performance of MOR-10.1 in mini-VPSA process.

## Sample stability characterization

Samples were exposed to air, different **pH** levels, and organic solvents, and their structural integrity was tested using **XRD**. Adsorption properties were analyzed using ASAP 2020. The air stability of samples is determined by exposing them to the air for different periods of time. Some organic solvents such as dimethylformamide, toluene, and carbon tetrachloride are used to explore stability. Sample (1 g) was added to a 50 mL solution and stirred for 48 hours. **pH** levels were adjusted by varying concentrations of NaOH and HNO<sub>3</sub>. Prior to evaluate the structural integrity and the adsorption properties, the samples underwent ion exchange using a NaCl solution (1 mol/L, 50 mL) at 353 K for 8 hours with stirring to account for changes in equilibrium ions caused by **pH** variation.



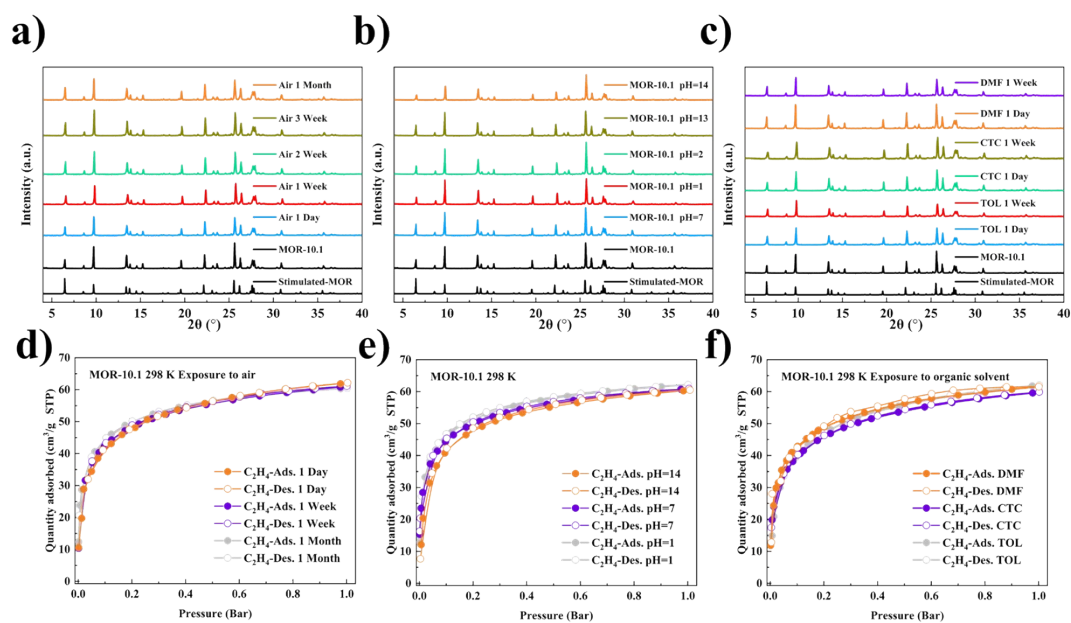

**Fig. S23.** (a-c) XRD patterns of MOR-10.1 exposed to air, different pH, and organic solvents, (d-f) adsorption isotherms of C<sub>2</sub>H<sub>4</sub>.

## Details of Stimulation

The GCMC simulations were conducted to determine the location of Na<sup>+</sup> cations in MOR. The framework were treated as rigid, and the fixed loading task and metropolis method were employed to simulate optimal adsorption sites at 298 K and 1.0 bar. The loading steps, equilibration steps, and production steps were all set to  $1.0 \times 10^7$ . The interactions between the skeleton and guest molecules were characterized using the COMPASS II force field, and guest gas molecules were optimized using the DMol3 module. The reported energy represents the minimum energy state of a structure containing one Al atom (and one Na<sup>+</sup> cation) per unit cell, and the minimum energy state corresponds to the most favorable location for the cations, indicate that the order of site occupancy obtained by all methods is as follows: T3 > T4 > T1 > T2<sup>8-10</sup>. To ensure a fair comparison, the super unit cells (222) based on the experimental Si/Al ratio were built. Simulations were carried out for the same partial pressure of C<sub>2</sub>H<sub>4</sub> and C<sub>2</sub>H<sub>6</sub> in pure Si-MOR as blank control. As for the effects of host-guest interaction, we use the calculation energy result based on the MS software:

$$E_{int} = E_{A-B} - (E_A + E_B)$$

$E_{A-B}$  is the total energy for the A-B combination,  $E_i$  is the energy for the structure  $i$ .

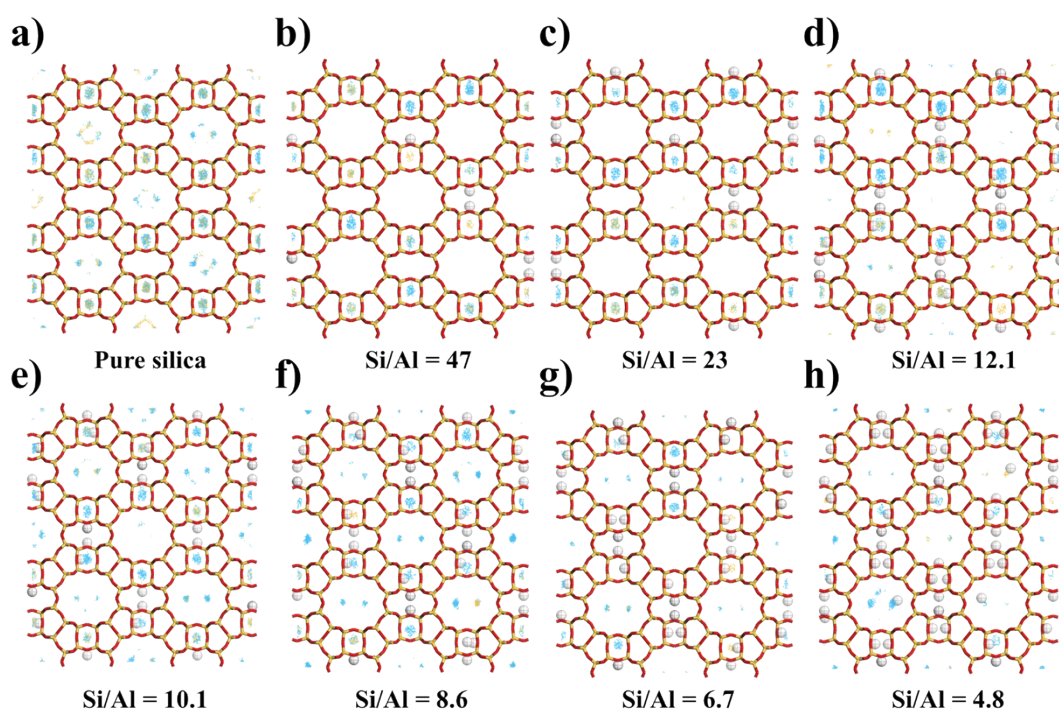

**Fig. S24.** Density distribution of  $C_2H_4$  (blue), and  $C_2H_6$  (orange) under the loading calculated from (a) blank control, and (b-h) breakthrough experiments.

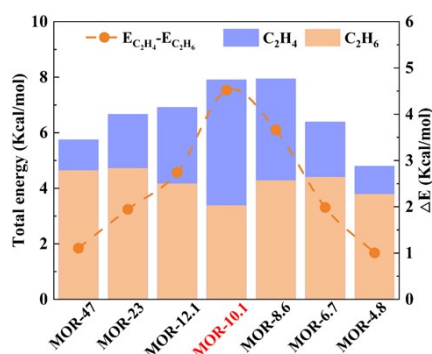

**Fig. S25.**  $C_2H_4$  and  $C_2H_6$  host-guest interaction energy simulation.

## Reference

1. P. J. Bereciartua, A. Cantin, A. Corma, J. L. Jorda, M. Palomino, F. Rey, S. Valencia, E. W. Corcoran, Jr., P. Kortunov, P. I. Ravikovitch, A. Burton, C. Yoon, Y. Wang, C. Paur, J. Guzman, A. R. Bishop and G. L. Casty, Control of zeolite framework flexibility and pore topology for separation of ethane and ethylene, *Science*, 2017, **358**, 1068-1071.
2. M. Shi, C. C. H. Lin, T. M. Kuznicki, Z. Hashisho and S. M. Kuznicki, Separation of a binary mixture of ethylene and ethane by adsorption on Na-ETS-10, *Chem. Eng. Sci.*, 2010, **65**, 3494-3498.

3. L. Yu, W. Chu, S. Z. Luo, J. D. Xing and F. L. Jing, Experimental Study of Silver-Loaded Mesoporous Silica for the Separation of Ethylene and Ethane, *J. Chem. Eng. Data*, 2017, **62**, 2562-2569.
4. L. Chen and X. Q. Liu,  $\pi$ -complexation mesoporous adsorbents Cu-MCM-48 for ethylene-ethane separation, *Chinese J. Chem. Eng.*, 2008, **16**, 570-574.
5. F. Gao, Y. Q. Wang, X. Wang and S. H. Wang, Adsorptive separation of ethylene/ethane mixtures with CuCl@HY adsorbent: equilibrium and reversibility, *J. Porous Mat.*, 2017, **24**, 713-719.
6. A. Van Miltenburg, W. Zhu, F. Kapteijn and J. A. Moulijn, Adsorptive Separation of Light Olefin/Paraffin Mixtures, *Chem. Eng. Res. Des.*, 2006, **84**, 350-354.
7. N. Hedin, G. J. DeMartin, W. J. Roth, K. G. Strohmaier and S. C. Reyes, PFG NMR self-diffusion of small hydrocarbons in high silica DDR, CHA and LTA structures, *Micropor. Mesopor. Mat.*, 2008, **109**, 327-334.
8. M. Jeffroy, C. Nieto-Draghi and A. Boutin, New Molecular Simulation Method To Determine Both Aluminum and Cation Location in Cationic Zeolites, *Chem. Mater.*, 2017, **29**, 513-523.
9. A. Vjunov, J. L. Fulton, T. Huthwelker, S. Pin, D. Mei, G. K. Schenter, N. Govind, D. M. Camaioni, J. Z. Hu and J. A. Lercher, Quantitatively probing the Al distribution in zeolites, *J. Am. Chem. Soc.*, 2014, **136**, 8296-8306.
10. B. Liu, E. García-Pérez, D. Dubbeldam, B. Smit and S. Calero, Understanding Aluminum Location and Non-framework Ions Effects on Alkane Adsorption in Aluminosilicates: A Molecular Simulation Study, *J. Phys. Chem. C*, 2007, **111**, 10419-10426.
